# Supplementary material
Source: PubMed Central journal article supplement (PMC11542998)
Supplement: NIHMS2031394-supplement-Supplementary_Material.pdf [file NIHMS2031394-supplement-Supplementary_Material.pdf]

**Supplementary Material –**  
Disparities in patient experiences on surgical breast cancer care by Arevalo et al.

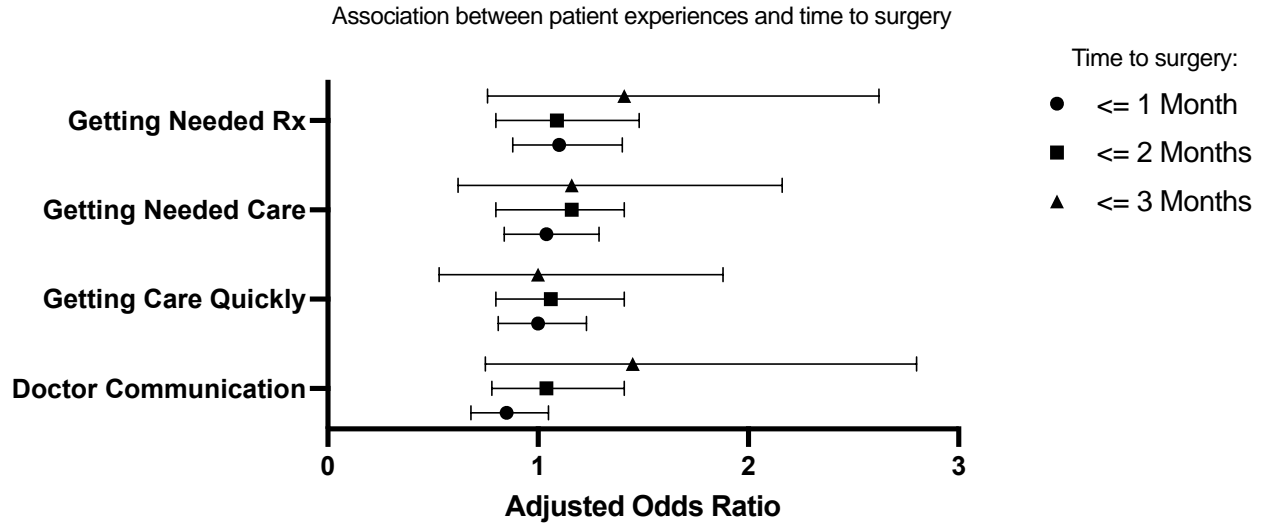

**Table A.** Results of unadjusted and adjusted multivariable logistic regression models assessing the relation between receiving timely surgical treatment and patient-reported experiences with care, while adjusting for clinical and demographic characteristics

| CAHPS<br>measures                                | Time between diagnosis and receipt of surgical treatment |           |           |           |             |           |           |           |            |           |           |           |
|--------------------------------------------------|----------------------------------------------------------|-----------|-----------|-----------|-------------|-----------|-----------|-----------|------------|-----------|-----------|-----------|
|                                                  | <= 1 month                                               |           |           |           | <= 2 months |           |           |           | <=3 months |           |           |           |
|                                                  | Unadjusted                                               |           | Adjusted● |           | Unadjusted  |           | Adjusted● |           | Unadjusted |           | Adjusted● |           |
|                                                  | OR                                                       | CI        | OR        | CI        | OR          | CI        | OR        | CI        | OR         | CI        | OR        | CI        |
| <b>Doctor communication</b><br>(n=1,578)         | 0.83                                                     | 0.67-1.02 | 0.85      | 0.68-1.05 | 1.00        | 0.76-1.34 | 1.04      | 0.78-1.41 | 1.38       | 0.73-2.63 | 1.45      | 0.75-2.80 |
| <b>Getting care quickly</b><br>(n=1,546)         | 1.02                                                     | 0.83-1.25 | 1.00      | 0.81-1.23 | 1.08        | 0.82-1.43 | 1.06      | 0.80-1.41 | 0.98       | 0.53-1.82 | 1.00      | 0.53-1.88 |
| <b>Getting needed care</b><br>(n=1,701)          | 1.12                                                     | 0.92-1.39 | 1.04      | 0.84-1.29 | 1.30        | 0.99-1.71 | 1.16      | 0.88-1.55 | 1.35       | 0.74-2.48 | 1.16      | 0.62-2.16 |
| <b>Getting needed Prescriptions</b><br>(n=1,763) | 1.08                                                     | 0.86-1.35 | 1.10      | 0.88-1.40 | 1.10        | 0.82-1.48 | 1.09      | 0.80-1.48 | 1.61       | 0.88-2.95 | 1.41      | 0.76-2.62 |

**Notes:**

- Excellent ratings consist of scores 90-100, and less than excellent consist of scores ≤ 89.99.
- Each model used one CAHPS measure (rows) as predictor of the outcome (columns), while adjusting for demographic and clinical characteristics. Thus, this table presents results of 24 separate models.

- • Models were adjusted for: age, race/ethnicity, marital status, SEER geographic region, self-reported comorbidities, tumor stage, type of surgery, Medicare plan, survey administration mode, survey year, and time since survey.
- † n=944 because of low variability in cell distribution of geographic region, 82 observations were removed from the model.
- Bold represents significant at \*p < .05, \*\*p < .01, \*\*\* p < .001

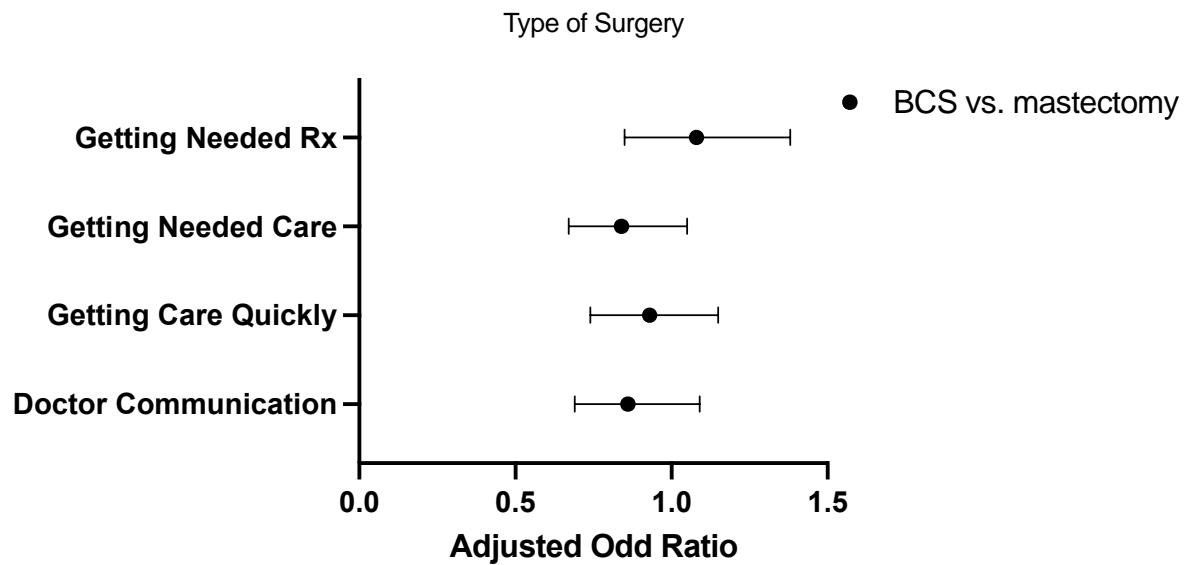

**Table B.** Results of unadjusted and adjusted multivariable logistic regression models assessing the relation between type of surgical treatment and patient-reported experiences with care, while adjusting for clinical and demographic characteristics

| CAHPS measures<br>Excellent vs less than excellent ratings | Type of Surgery† |           |           |           |
|------------------------------------------------------------|------------------|-----------|-----------|-----------|
|                                                            | Unadjusted       |           | Adjusted• |           |
|                                                            | OR               | 95% CI    | OR        | 95% CI    |
| <b>Doctor communication</b><br>(n=1,578)                   | 0.88             | 0.72-1.10 | 0.86      | 0.69-1.09 |
| <b>Getting care quickly</b><br>(n=1,546)                   | 0.94             | 0.76-1.16 | 0.93      | 0.74-1.15 |
| <b>Getting needed care</b><br>(n=1,701)                    | 0.83             | 0.68-1.03 | 0.84      | 0.67-1.05 |
| <b>Getting needed Prescriptions</b><br>(n=1,763)           | 1.06             | 0.85-1.34 | 1.08      | 0.85-1.38 |

Notes:

- † modeling the odds of receiving BCS (vs Mastectomy)
- BCS = Breast Conserving Surgery
- Excellent ratings consist of scores 90-100, and less than excellent  $\leq 89.99$ .
- Models were adjusted for: age, race/ethnicity, marital status, SEER geographic region, self-reported comorbidities, tumor stage, Medicare plan, survey administration mode, survey year, and time since survey.
- Bold represents significant at \*p < .05, \*\*p < .01, \*\*\* p < .001
